# Supplementary material for: The Transcriptional Activator Krüppel-like Factor-6 Is Required for CNS Myelination
Source: PLoS Biol. 2016 May 23;14(5):e1002467. doi: 10.1371/journal.pbio.1002467 (PMC4877075; doi:10.1371/journal.pbio.1002467)
Supplement: S1 Table — Results shown here complement data in Figs 4 and S5 and in S2 and S3 Tables. Results of RNA-seq profiling of primary mouse OLP silenced for Klf6 versus non-targeting control to identify Klf6-regulated transcripts, as described in the text and illustrated in S5 Fig. Data from two separate cultures have been filtered for statistically significant differential expression with FDR correction p < 0.05 (Q value, shown). Results from iOL are in S2 Table. Transcripts shared by both OLP and iOL are also shown in S3 Table. This analysis identifies 172 unique Klf6-regulated transcripts in OLP. Regulated transcripts are presented together with FPKM values, fold change, Q value, Unigene ID identifiers and PMID numbers for relevant references, and associated functions (summarized in Fig 4B). Results are color-coded using the scheme illustrated in Figs 4–6 for primary OLP (red) and shared transcripts (purple). Data are available on the GEO website (http://www.ncbi.nlm.nih.gov/geo/) (Accession number GSE79245). (XLSX) [file pbio.1002467.s009.xlsx]

## Sheet: Table S1
Gene Symbol	Name	UniGene ID	Value - NT	Value - siRNA	Fold change (log2)	Test Stat	Q Value	PMID	Myelin	Diffn.	Viability	Prolif.	Migr/Adh.	Cytoskel.	Ubiquit.	Signaling	TF	Stat	MAPK	Klf/Sp	Tgf	Wnt/Ntc	PI3K
Serpina3n	Serpin peptidase inhibitor A3	Mm.482074	24.2165	1.17308	-4.36762	-9.40283	0.00455345	15795238					X
Socs2	Suppressor of cytokine signaling 2	Mm.474283	4.29094	0.24056	-4.15682	-7.03095	0.00455345	10910765			X					X		X
Fosl2	FOS-like antigen 2	Mm.24684	27.1914	1.57282	-4.11173	-12.4597	0.00455345	20585340		X	X					X	X		X
Mir124a-3	MicroRNA 124a-3	-	55.2466	3.51773	-3.97317	-11.6357	0.00455345	25248747								X				X
Junb	Jun B proto-oncogene	Mm.1167	52.245	3.44534	-3.92258	-12.7636	0.00455345	11286924		X	X					X	X		X
Atf3	Activating transcription factor 3	Mm.2706	5.82422	0.673972	-3.1113	-6.49606	0.00455345	21061913								X	X
Cish	Cytokine inducible SH2-containing protein	Mm.4592	8.05731	1.18069	-2.77066	-6.12364	0.00455345	20484391		X						X		X
Csrnp1	Cysteine-serine-rich nuclear protein 1	Mm.491094	16.694	2.47255	-2.75526	-7.72103	0.00455345	19544579		X						X	X					X
Arid5a	AT rich interactive domain 5A	Mm.34316	13.0076	1.97118	-2.72222	-7.31829	0.00455345	21346191		X						X	X
Socs3	Suppressor of cytokine signaling 3	Mm.3468	44.6033	6.88389	-2.69585	-9.03337	0.00455345	16682639			X					X		X
Klf5	Kruppel-like factor 5	Mm.30262	6.77388	1.08053	-2.64825	-7.00762	0.00455345	20959618		X	X					X	X			X
Sbno2	Strawberry notch homolog 2	Mm.262102	34.0503	5.46486	-2.63941	-8.36636	0.00455345	18025162								X	X	X
Ccl2	Chemokine (C-C motif) ligand 2	Mm.290320	7.31219	1.21504	-2.5893	-6.09338	0.00455345	12027417
Maff	V-maf homolog F transcription factor	Mm.86646	20.1599	3.74604	-2.42805	-6.84108	0.00455345	22721719								X	X
Mir125a	MicroRNA 125a	-	7.8826	1.58046	-2.31833	-5.10605	0.00455345	24151079								X
Irf1	Interferon regulatory factor 1	Mm.105218	21.1302	4.24763	-2.31458	-6.30958	0.00455345	7687056								X	X
Adamts1	ADAM metallopeptidase with thrombospondin 1	Mm.1421	61.2072	12.8128	-2.25612	-8.27829	0.00455345	19734141					X
Nedd4	Neural precursor expressed, develop. down-reg. 4	Mm.279923	250.215	54.5066	-2.19867	-9.86361	0.00455345	25527121							X
Map3k8	Mitogen-activated prot. kinase kinase kinase 8	Mm.3275	3.34532	0.731751	-2.19272	-4.46264	0.00455345	19689369			X					X			X
Tm4sf1	Transmembrane 4 L six family 1	Mm.856	6.69855	1.47711	-2.18107	-5.0285	0.00455345	21626280					X
Fos	c-Fos proto-oncogene	Mm.246513	78.5327	17.4579	-2.16941	-8.00151	0.00455345	1464462								X	X		X
Dusp5	Dual specificity phosphatase 5	Mm.482424	8.8235	1.98285	-2.15378	-5.63109	0.00455345	25489104								X			X
Phlda1	Pleckstrin homology-like domain A1	Mm.3117	124.265	28.3996	-2.12948	-8.81396	0.00455345	15037619		X						X
Vgf	VGF nerve growth factor, inducible	Mm.389697	21.6953	5.08013	-2.09444	-6.65993	0.00455345	21621608			X
Gpr3	G protein-coupled receptor 3	Mm.4721	3.6437	0.854064	-2.09299	-5.07159	0.00455345	15591206				X				X
Fam43a	Family with sequence similarity 43a	Mm.28244	4.69554	1.16762	-2.00773	-5.50105	0.00455345	19542019		X
Cebpb	CCAAT/enhancer binding protein beta	Mm.439656	4.88205	1.22817	-1.99098	-6.04559	0.00455345	19749746		X		X				X	X
Nefl	Neurofilament, light polypeptide	Mm.1956	4.30848	1.11877	-1.94527	-4.39859	0.00455345	14733962						X
Gadd45b	Growth arrest and DNA-damage-inducible beta	Mm.1360	6.47537	1.79644	-1.84982	-4.71547	0.00455345	9827804								X			X
Gadd45g	Growth arrest and DNA-damage-inducible, gamma	Mm.281298	168.108	48.6826	-1.78791	-8.00753	0.00455345	9827804								X			X
Klf4	Kruppel-like factor 4	Mm.4325	3.91192	1.14871	-1.76786	-4.57214	0.00455345	20959618			X					X	X			X
Pxdc1	PX domain containing 1	Mm.28943	17.0131	5.07023	-1.74653	-6.10469	0.00455345	19322201
Adamts4	ADAM metallopeptidase 4	Mm.491147	15.8172	4.75322	-1.73452	-5.36528	0.00455345	11854269					X
Tubb3	Tubulin beta 3	Mm.40068	20.6385	6.36516	-1.69707	-5.58927	0.00455345	20406197					X	X
Dbx2	Developing brain homeobox 2	Mm.152937	13.6366	4.5223	-1.59235	-4.66002	0.00455345	11239429		X						X	X
Trim62	Tripartite motif containing 62	Mm.30653	39.3597	13.1729	-1.57915	-5.51464	0.00455345	23402750							X
Mthfd2l	Methylenetetrahydrofolate dehydrogenase 2-like	Mm.153030	14.9738	5.08612	-1.5578	-5.16214	0.00455345	21163947
Nfil3	Nuclear factor, interleukin 3 regulated	Mm.136604	10.9322	3.74957	-1.54378	-3.99429	0.00455345	7565758								X	X
Pi4k2b	Phosphatidylinositol 4-kinase II beta	Mm.248647	3.22471	1.12005	-1.52561	-3.86531	0.00455345	18316730								X							X
Gp130/Il6st	Glycoprotein 130 (gp130 receptor)	Mm.4364	23.7924	8.31091	-1.51742	-5.39702	0.00455345	14698616			X					X		X	X
Lonrf1	LON peptidase domain and ring finger 1	Mm.324032	9.88939	3.46668	-1.51233	-5.3158	0.00455345	18253036							X
Anxa2	Annexin A2	Mm.238343	7.19501	2.53356	-1.50583	-3.41136	0.00455345	24591759								X
Ier5l	Immediate early response 5-like	Mm.295464	63.2196	22.4037	-1.49663	-5.92961	0.00455345	20977730
Paqr8	Progestin and adipoQ receptor VIII	Mm.40780	32.0844	12.1612	-1.39958	-5.09537	0.00455345	23763432								X
Hk2	Hexokinase 2	Mm.255848	11.2035	4.25507	-1.3967	-4.68407	0.00455345	21726646
Bhlhe40	Basic helix-loop-helix e40	Mm.2436	33.79	12.9889	-1.37932	-4.73318	0.00455345	12384505		X							X
Irgm1	Immunity-related GTPase M1	Mm.29938	14.4619	5.62261	-1.36294	-3.85516	0.00455345	20056715
Tirap	Toll-IL-1 receptor domain adaptor protein	Mm.23987	6.26859	2.49385	-1.32977	-4.01013	0.00455345	18706831											X
Slc30a4	Solute carrier family 30, member 4	Mm.27801	19.9134	7.92768	-1.32877	-5.21373	0.00455345	9521625
Nptx2	Neuronal pentraxin II	Mm.10099	29.9785	11.9681	-1.32473	-4.95649	0.00455345	8530029
Acsl4	Acyl-CoA synthetase long-chain family member 4	Mm.391337	21.2217	8.68227	-1.2894	-5.00402	0.00455345	23520119	X
Parp3	Poly (ADP-ribose) polymerase 3	Mm.273659	3.87444	1.59748	-1.27819	-2.87119	0.00455345	21270334			X
Ptchd2	Patched 2	Mm.33873	3.14786	1.30725	-1.26783	-3.70104	0.00455345	25281927		X		X				X
Ltbr	lymphotoxin beta receptor	Mm.3122	21.8095	9.05763	-1.26775	-4.39243	0.00455345	7578992			X					X
Mtfr2	Mitochondrial fission regulator 2	Mm.262151	15.8464	6.60886	-1.26168	-4.31012	0.00455345	20568109
Dcc	Deleted in colorectal cancer: netrin-1 receptor	Mm.167882	8.09981	3.41864	-1.24447	-4.63841	0.00455345	18269208					X			X
Zfp36	Zinc finger protein 36	Mm.389856	4.82882	2.04443	-1.23997	-3.00429	0.00829634	8630730
Unc13b	Unc-13 homolog B	Mm.128892	3.59387	1.52281	-1.2388	-3.39155	0.00455345	8999968
Sertad1	SERTA domain containing 1	Mm.153684	24.9622	10.9517	-1.18859	-3.90456	0.00455345	20237268				X
Rnf19b	Ring finger protein 19B	Mm.259672	30.413	13.4896	-1.17284	-4.45276	0.00455345	19915045							X
S100a10	S100 calcium binding protein A10	Mm.1	124.069	55.1526	-1.16964	-5.84145	0.00455345	23193360		X		X
Trnp1	TMF1-Regulated Nuclear Protein 1	Mm.151594	3.92894	1.78946	-1.13461	-2.76	0.0229178	23622239		X
Pim3	Pim-3 oncogene	Mm.400129	34.8526	16.0817	-1.11585	-4.74552	0.00455345	10713710			X	X				X
Slc41a1	Solute carrier family 41, member 1	Mm.389181	17.2549	7.99709	-1.10946	-3.84058	0.00455345	22031603
Tagln2	Transgelin 2	Mm.271711	354.155	165.839	-1.0946	-5.40114	0.00455345	24476357						X
Eif1a	Eukaryotic translation initiation factor 1A	Mm.262037	39.5041	18.613	-1.0857	-4.15641	0.00455345	20921384
Rgs16	Regulator of G-protein signaling 16	Mm.181709	6.55618	3.09456	-1.08312	-3.08902	0.00455345	15998835								X
Eef2k	Eukaryotic elongation factor-2 kinase	Mm.25997	6.34366	3.00159	-1.07959	-3.47696	0.00455345	23706743				X				X
Ehd2	EH-domain containing 2	Mm.138215	8.73862	4.14201	-1.07707	-3.35111	0.00455345	22323287						X
Zfp703	Zinc finger protein 703	Mm.212469	19.7956	9.50616	-1.05824	-4.00407	0.00455345	21317240					X			X						X
Yeats4	YEATS domain containing 4	Mm.233529	52.849	25.5652	-1.0477	-3.48587	0.00455345	16698963								X	X		X
Shb	Src homology 2 domain adaptor protein B	Mm.251716	10.8095	5.23732	-1.0454	-3.66221	0.00455345	9484780		X						X
Cldn11	Claudin-11	Mm.4425	19.6876	9.55822	-1.04247	-4.01445	0.00455345	10612400	X				X	X
Otud6b	OTU domain containing 6B	Mm.387724	29.6613	14.4063	-1.04189	-4.25024	0.00455345	21267069							X
Ndfip2	Nedd4 family interacting protein 2	Mm.290669	43.4339	21.2432	-1.03182	-4.27464	0.00455345	20534535							X	X			X
Itga7	Integrin alpha 7	Mm.179747	6.93029	3.39604	-1.02906	-2.7731	0.00455345	24227711					X
Cplx1	Complexin 1	Mm.5195	6.65192	3.28644	-1.01724	-3.04235	0.0201432	23352168
Jun	Jun proto-oncogene	Mm.275071	150.006	74.1143	-1.0172	-4.72024	0.00455345	12189388			X					X	X		X
Ppp1r1a	protein phosphatase 1, regulatory subunit 1A	Mm.143788	6.50115	3.2439	-1.00296	-2.28099	0.04448	18689792								X
Pde4b	Phosphodiesterase 4B	Mm.20181	61.423	30.7534	-0.998036	-3.75049	0.00455345	19128237								X
Otud1	OTU deubiquitinase 1	Mm.83981	8.63804	4.33394	-0.995025	-3.26295	0.00455345	23827681							X
Aldh1a3	Aldehyde dehydrogenase 1 family A3	Mm.140988	7.87724	3.95881	-0.992624	-2.35288	0.0277459	17207476		X
Homer2	Homer homolog 2	Mm.228	3.11331	1.5653	-0.992012	-3.32789	0.00455345	9069287						X
Tbc1d22a	TBC1 domain family 22a	Mm.28904	4.96723	2.49799	-0.991675	-2.85218	0.0117668	23572552
Pvrl1	Poliovirus receptor-like 1	Mm.335096	15.6653	7.92165	-0.983697	-3.5155	0.00455345	11827984					X
Emp2	Epithelial membrane protein 2	Mm.246009	4.58835	2.32133	-0.983023	-2.92135	0.00829634	12189152					X			X
Prr5l	Proline rich 5 like	Mm.24138	6.24563	3.16886	-0.978884	-2.93735	0.00455345	22609986		X						X
Sez6	Seizure related 6	Mm.229330	15.5669	7.90378	-0.977864	-3.43081	0.00455345	18031681						X
Syt4	Synaptotagmin 4	Mm.233846	7.61471	3.8681	-0.977164	-3.22708	0.0117668	20010821
Tor2a	Torsin family 2, member A	Mm.200695	27.5983	14.0357	-0.97548	-3.70502	0.00455345	12910263				X
Zfp2	Zinc finger protein 2	Mm.259230	8.67929	4.4426	-0.966172	-2.94959	0.00455345	3815523		X						X	X
En2	Engrailed homeobox 2	Mm.4298	6.69217	3.43098	-0.963852	-2.98706	0.0180068	12821143		X						X	X
Klf6	Kruppel-like factor 6	Mm.275036	39.5961	20.359	-0.95969	-4.04745	0.00455345	20959618		X	X					X	X
Mex3d	Mex-3 RNA binding protein D	Mm.268389	16.6179	8.56943	-0.95547	-3.85331	0.00455345	17267406		X
2810459M11Rik	RIKEN cDNA 2810459M11	Mm.54981	3.69391	1.90498	-0.955369	-2.57562	0.0277459	N/A
Ndrg2	N-Myc downstream-regulated gene 2	Mm.26722	13.026	6.76379	-0.945493	-2.81865	0.00829634	16039777						X
Erf	Ets2 repressor factor	Mm.8068	63.3716	32.9805	-0.942221	-3.47966	0.00455345	11175360		X		X				X	X
Plekho2	Pleckstrin homology domain O family 2	Mm.247303	7.5723	3.96292	-0.934166	-2.69467	0.00455345	N/A
Stat1	Signal transducer and activator of transcription 1	Mm.277406	7.45135	3.91752	-0.927559	-2.99291	0.00455345	14698616		X	X					X	X	X
S100a11	S100 calcium binding protein A11	Mm.280038	56.1932	30.2077	-0.895479	-4.25067	0.0298981	14623863					X	X
Impa5/Kpna1	Importin alpha 5	Mm.6952	25.5701	13.7882	-0.891028	-3.40779	0.00455345	17159997		X	X					X
Tnfrsf1a	TNF receptor 1	Mm.1258	66.4819	35.8801	-0.889779	-3.73486	0.00455345	16216134			X					X
Map3k14	Mitogen-activated prot. kinase kinase kinase 14	Mm.158981	3.90623	2.10924	-0.88905	-2.28367	0.0298981	9346485			X					X
Sik1	Salt-inducible kinase 1	Mm.290941	4.16539	2.25107	-0.887844	-2.6808	0.0256615	17939993								X
Daglb	Diacylglycerol lipase beta	Mm.469963	6.32555	3.42364	-0.885661	-2.66331	0.0201432	20159446
Rassf2	Ras association 2	Mm.204737	25.0998	13.5931	-0.884803	-3.29564	0.00455345	12732644		X		X				X
Fgfrl1	Fibroblast growth factor receptor-like 1	Mm.35691	40.5213	22.1132	-0.873771	-3.21735	0.00455345	17011755		X	X					X
Ptgfrn	Prostaglandin F2 receptor inhibitor	Mm.24807	4.09814	2.24617	-0.867503	-2.73811	0.0117668	11278880					X
Chmp5	Charged multivesicular body protein 3	Mm.212763	81.9492	44.9248	-0.867216	-3.87213	0.00455345	16567502			X
Samd4b	Sterile alpha motif domain containing 4B	Mm.54120	28.5335	15.7029	-0.861621	-2.59619	0.0229178	20510020								X			X
Cyb5	Cytochrome b5	Mm.31018	74.4275	41.0283	-0.859216	-3.77178	0.00455345	7733981
Rnf122	Ring finger protein 122	Mm.29532	27.4884	15.2189	-0.852963	-3.12206	0.00455345	20553626							X
Ing1	Inhibitor of growth family, member 1	Mm.25709	38.2485	21.2432	-0.8484	-3.19502	0.00455345	11956069		X
Bcap29	B-cell receptor-associated 29	Mm.242379	13.3334	7.41323	-0.846872	-2.66689	0.0256615	15187134
Hunk	Hormonally up-regulated Neu-associated kinase	Mm.125874	7.88544	4.3875	-0.845792	-2.73959	0.0180068	19717424								X
Mapk11	Mitogen-activated protein kinase 11	Mm.91969	6.2315	3.47472	-0.842683	-2.21689	0.04448	16287858			X					X			X
Sh3d19	SH3 domain containing 19	Mm.2454	20.4701	11.4259	-0.84121	-3.2639	0.00455345	15280379				X	X
Mfhas1	Malignant fibrous histiocytoma amplified 1	Mm.103246	7.1893	4.03194	-0.834377	-2.63232	0.0348264	14691450				X
Cited2	Cbp/p300-interacting transactivator 2	Mm.272321	31.5104	17.6886	-0.833005	-3.47461	0.00455345	22814619				X
Sdc4	Syndecan 4	Mm.3815	17.8073	9.99962	-0.832527	-3.12272	0.0117668	23760952		X						X
Cnksr3	CNKSR family member 3	Mm.37984	9.85272	5.55089	-0.827803	-2.57531	0.0201432	19567370											X
Gm16515	Chromosome 17 Open Reading Frame 103	Mm.22780	23.1242	13.0404	-0.826419	-3.22742	0.00455345	N/A
Bcl2l11	Bcl2-like 11	Mm.141083	9.09185	5.16247	-0.816513	-2.87676	0.0180068	23064249			X
Midn	Midnolin	Mm.143813	97.3464	55.278	-0.816424	-3.51749	0.00455345	24187134								X
Pid1	Phosphotyrosine interaction domain containing 1	Mm.187470	38.7393	22.0317	-0.814217	-3.36163	0.00455345	23927930								X
Ube2g2	Ubiquitin-conjugating enzyme E2G 2	Mm.458125	37.6734	21.5863	-0.803433	-2.90779	0.00455345	19223579							X
Trib1	Tribbles pseudokinase 1	Mm.40298	24.7877	14.23	-0.800685	-3.0298	0.00455345	23515163		X					X
Spsb1	SplA/ryanodine receptor domain and SOCS box 1	Mm.30	9.26772	5.37668	-0.785499	-2.40919	0.0298981	20561531							X
2610034B18Rik	Riken cDNA 2610034B18	Mm.34266	12.7663	7.40972	-0.784853	-2.33618	0.0485082	N/A
Gxylt1	Glucoside xylosyltransferase 1	Mm.22819	48.9081	28.5133	-0.77844	-2.90799	0.00829634	22117070		X		X				X						X
Nedd9	Neural precursor expressed, develop. down-reg. 9	Mm.288980	9.40941	5.50926	-0.772246	-2.50579	0.0180068	22509381					X
Pvr	Poliovirus receptor	Mm.227506	17.44	10.2782	-0.762804	-2.78071	0.0201432	16322240					X
9430020K01Rik	RIKEN cDNA 9430020K01	Mm.33179	4.74338	2.80109	-0.759928	-2.45512	0.0277459	N/A
Git2	G protein-coupled receptor interacting ArfGAP 2	Mm.195632	13.597	8.06265	-0.753958	-2.82269	0.00455345	16628223					X	X
Fgf1	Fibroblast growth factor 1 (acidic)	Mm.241282	8.23552	4.90326	-0.748117	-2.46056	0.039334	25589163	X
F3	Thromboplastin	Mm.273188	16.7282	10.0311	-0.737806	-2.38519	0.0466059	17600222
Prkar2a	Protein kinase, cAMP-dependent, regulatory IIa	Mm.253102	30.061	18.1277	-0.729699	-2.99623	0.00455345	11591815
Ppp3ca	Protein phosphatase 3, catalytic subunit, alpha	Mm.331389	61.6969	37.3412	-0.72443	-2.74722	0.0201432	8978785				X				X
Csf1	Colony stimulating factor 1	Mm.795	10.64	6.47198	-0.717216	-2.26914	0.03705	12393446		X
Ado	2-aminoethanethiol dioxygenase	Mm.297250	22.3618	13.6248	-0.714803	-2.93464	0.00829634	17581819
C530008M17Rik	KIAA1211 protein	Mm.101504	34.3278	20.9388	-0.713199	-2.85411	0.00455345	N/A
Smurf1	SMAD specific E3 ubiquitin protein ligase 1	Mm.27735	16.7778	10.2477	-0.711256	-2.6149	0.0152365	17728459					X		X	X					X
Agfg2	ArfGAP with FG repeats 2	Mm.260869	22.318	13.657	-0.708569	-2.47786	0.0348264	21284487
Fktn	Fukutin	Mm.247210	11.6385	7.12416	-0.708112	-2.66265	0.0201432	23591631
Zfp36l1	Zinc Finger Protein 36, C3H Type-Like 1	Mm.235132	69.1639	42.3881	-0.706361	-3.2733	0.00455345	20702587		X						X	X
Pros1	Protein S alpha	Mm.127156	26.0263	15.9782	-0.703868	-2.66223	0.0201432	17849042
Tmem65	Transmembrane protein 65	Mm.293754	29.3168	18.0483	-0.699862	-2.95579	0.00829634	20877624
Ccng1	Cyclin G1	Mm.2103	211.208	130.118	-0.698847	-3.26869	0.00455345	12556559				X
E2f7	E2F transcription factor 7	Mm.11747	10.8777	6.70436	-0.698198	-2.54367	0.03705	14633988				X
Arf6	ADP-ribosylation factor 6	Mm.27308	46.9309	28.9503	-0.696963	-3.13343	0.00455345	24139303					X	X		X
Wnt7b	Wingless 7b	Mm.306946	13.8266	8.53677	-0.695684	-2.57057	0.03705	25018103		X												X
Pip4k2b	Phosphatidylinositol-5-phosphate 4-kinase II beta	Mm.39700	37.3627	23.0939	-0.694089	-2.88471	0.00455345	24209622				X											X
Csnk1g3	Casein kinase 1, g3	Mm.368668	25.5221	15.8376	-0.688398	-2.78978	0.00455345	9925945		X												X
Stmn3	Stathmin-like 3	Mm.2319	115.503	71.8248	-0.685374	-3.49231	0.0229178	25028095					X	X
B4galt6	Beta 1,4- galactosyltransferase 6	Mm.393827	18.791	11.7765	-0.674133	-2.86521	0.0201432	25216636
Jak1	Janus kinase 1	Mm.289657	25.6809	16.1404	-0.670025	-2.40115	0.0298981	14698616		X	X					X		X
Atp1b2	ATPase, Na+/K+ transporting, beta 2	Mm.235204	52.6913	33.4414	-0.655929	-2.94928	0.00829634	1688561					X
Gtf2e2	General transcription factor IIE, 2	Mm.286104	38.6043	24.5189	-0.65487	-2.4475	0.039334	9618479
Stat3	Signal transducer and activator of transcription 3	Mm.249934	85.0272	54.0219	-0.65438	-2.55035	0.0117668	14698616		X	X					X	X	X
Litaf	Lipopolysaccharide-induced TNF factor	Mm.294753	48.0033	30.5756	-0.650753	-2.83457	0.0298981	10200294								X
Elovl6	ELOVL fatty acid elongase 6	Mm.314113	40.5499	25.8952	-0.647012	-2.74261	0.0180068	12084938	X
Brd1	Bromodomain containing 1	Mm.254438	17.5513	11.274	-0.638583	-2.44235	0.0298981	25519988								X
F2r	Thrombin receptor	Mm.24816	43.8561	28.4637	-0.623655	-2.61286	0.0201432	22521721		X						X
Myc	V-myc viral oncogene homolog	Mm.2444	89.4414	58.1031	-0.622327	-2.55377	0.0180068	24502923				X				X	X
Fam108b	Abhydrolase domain containing 17B	Mm.28796	87.6248	57.1311	-0.617062	-2.83768	0.0256615	None
Ireb2	Iron-responsive element binding protein 2	Mm.208991	34.4655	22.8806	-0.591028	-2.56674	0.0325198	24896637
Prps2	Phosphoribosyl pyrophosphate synthetase 2	Mm.272955	27.0677	40.5708	0.583872	2.39807	0.0485082	24855946
Lama4	Laminin, alpha 4	Mm.258065	13.986	21.4602	0.617679	2.36212	0.0180068	15814800					X
Mbnl1	Muscleblind-like splicing regulator 1	Mm.255723	15.3483	23.6991	0.626755	2.61389	0.0201432	16533306		X						X
Pgap1	Post-GPI attachment to proteins 1	Mm.103539	14.162	22.0139	0.636395	2.87755	0.0152365	24784135
Tmem35	Transmembrane protein 35	Mm.41489	59.4992	93.7307	0.655652	3.00467	0.0256615	20685870					X
Dusp6	Dual specificity phosphatase 6	Mm.1791	106.973	171.98	0.684993	3.22126	0.00455345	18280112								X			X
Dact1	Dishevelled-binding antagonist of beta-catenin 1	Mm.46662	35.8648	57.8536	0.689839	2.89516	0.00455345	11970895		X						X						X
Fam102a	Family with sequence similarity 102a	Mm.4065	10.9555	17.788	0.69925	2.70438	0.0152365	23478294								X
Arc	Activity-regulated cytoskeleton-associated protein	Mm.491310	13.9706	22.8973	0.712777	2.48274	0.0180068	9808461					X	X
Pik3r3	PI3 kinase subunit 3	Mm.253819	17.077	28.5743	0.742659	2.90532	0.00455345	24837077			X					X							X
Chic1	Cysteine-rich hydrophobic domain 1	Mm.42223	2.13211	3.58048	0.747874	2.59798	0.0485082	11257495
Ctns	Cystinosin, lysosomal cystine transporter	Mm.259852	4.66853	7.87837	0.754928	2.37637	0.0466059	9537412
Hap1	Huntingtin-associated protein 1	Mm.281700	37.628	63.567	0.756472	2.89334	0.00455345	7477378
Sox9	SRY-box transcription factor 9	Mm.286407	56.0683	94.969	0.760272	3.49731	0.00455345	12842915		X						X	X
Ampd3	Adenosine monophosphate deaminase 3	Mm.3238	5.00989	8.51323	0.764928	2.50246	0.0201432	1400401
Ckmt1	Creatine kinase, mitochondrial 1	Mm.252145	50.8056	86.8394	0.773363	3.30881	0.00455345	24522192
Ddit4l	DNA-damage-inducible transcript 4-like	Mm.250841	21.1862	36.4452	0.782604	3.2293	0.0117668	15632201								X
Fam214a	Family with sequence similarity 214a	Mm.208955	5.61828	9.71105	0.789499	2.64004	0.0152365	None
Chrdl1	Chordin-like 1	Mm.157697	6.31208	11.0023	0.801621	2.80262	0.0117668	11441185		X						X					X
Sema4b	Semaphorin 4b	Mm.275909	3.76651	6.63128	0.816058	2.53459	0.0256615	25746385					X			X
Sel1l3	Sel-1 suppressor of lin-12-like 3	Mm.235020	3.38837	5.9868	0.821192	2.66319	0.0117668	24453213
Glcci1	Glucocorticoid induced transcript 1	Mm.210787	7.25118	12.9055	0.8317	3.38627	0.00455345	21991891
Sox21	SRY-box transcription factor 21	Mm.70950	20.7888	37.0662	0.834299	3.51507	0.00455345	25448693		X						X
Cntn4	Contactin 4	Mm.321683	1.82802	3.27681	0.842009	2.37011	0.03705	15106122					X
Tns3	Tensin 3	Mm.337820	34.3339	61.6284	0.843964	3.3415	0.00455345	15733665					X	X
Atp1b1	ATPase, Na+/K+ transporting, beta 1	Mm.4550	29.3548	52.6988	0.844174	2.79358	0.00829634	15485816
Pnmal1	Paraneoplastic Ma antigen family-like 1	Mm.275673	6.5268	11.7966	0.853921	2.299	0.0277459	None
Nt5e	5'-Nucleotidase, Ecto (CD73)	Mm.244235	4.44147	8.03544	0.855338	2.67041	0.00829634	9553767		X			X
Bcl6	B-cell CLL/lymphoma 6	Mm.347398	3.58615	6.51641	0.861641	2.76949	0.0180068	12555064		X	X	X
Fbln2	Fibulin 2	Mm.249146	10.7152	19.8092	0.886518	2.98384	0.00455345	18070922					X
Peg3	Paternally expressed 3	Mm.389800	23.0725	43.2969	0.908087	3.00325	0.00455345	9500555								X
Adm	Adrenomedullin	Mm.1408	6.77492	12.7438	0.911518	3.05346	0.0201432	9015481
Pnmal2	Paraneoplastic Ma antigen-like 2	Mm.483018	15.147	28.8048	0.927283	3.64099	0.00455345	None
Sox8	SRY-box transcription factor 8	Mm.258220	37.0727	71.6437	0.950484	3.15111	0.0229178	15102707		X							X
Col11a1	Collagen 11 alpha 1	Mm.209715	17.8763	34.9595	0.967637	3.86055	0.00455345	7859283					X
Cxxc4	CXXC finger protein 4	Mm.224814	2.71047	5.32816	0.975096	3.38324	0.00455345	11113207		X						X						X
Antxr2	Capillary Morphogenesis Protein 2	Mm.24842	2.06646	4.21661	1.02892	2.89801	0.00829634	12973667					X
Gabrg3	GABA A receptor gamma 3	Mm.434343	2.87202	5.86481	1.03002	2.60685	0.0229178	8146195
Dgkk	Diacylglycerol kinase kappa	Mm.464416	5.07077	10.4573	1.04424	3.94722	0.00455345	21113153								X
Sv2c	Synaptic vesicle glycoprotein 2C	Mm.40436	3.79209	7.91823	1.06219	3.92025	0.00455345	16306227
Synpr	Synaptoporin	Mm.317515	5.05482	10.684	1.07972	3.54329	0.00455345	2206533
Zcchc12	Zinc finger, CCHC domain containing 12	Mm.297698	38.7823	86.4754	1.15689	4.50803	0.00455345	18160706		X						X					X
Car3	Carbonic anhydrase III, muscle specific	Mm.300	18.7001	51.4931	1.46133	5.89049	0.00455345	15509796
vWA5A	von Willebrand factor A 5A	Mm.290950	1.09519	3.04168	1.47368	3.81372	0.00455345	14504409
Nrgn	Neurogranin	Mm.335065	9.37126	31.4365	1.74613	5.62688	0.00455345	9396008
A730017C20Rik	RIKEN cDNA A730017C20	Mm.209711	0.94356	3.218	1.76998	3.84281	0.00455345	None
								Gene number:	4	47	26	20	30	14	12	86	26	8	16	3	3	7	3
								% Total	0.0188679	0.221698	0.122642	0.0943396	0.141509	0.0660377	0.057	0.40566	0.122642	0.0377358	0.0754717	0.0141509	0.0141509	0.0330189	0.0141509
